# 1 Chromatin accessibility changes induced by the 2 microbial metabolite butyrate reveal possible 3 mechanisms of anti-cancer effects

4 Matthew G. Durrant<sup>1,\*</sup>, Brayon J. Fremin<sup>1,\*</sup>, Abhiram Rao<sup>3</sup>, Emily  
5 Cribas<sup>4</sup>, Stephen Montgomery<sup>1,5,\*</sup>, Ami S. Bhatt<sup>1,2,\*</sup>

6 \* These authors contributed equally to this study

7 <sup>1</sup> Department of Genetics, Stanford University, Stanford, California, USA

8 <sup>2</sup> Department of Medicine (Hematology), Stanford University, Stanford, California, USA

9 <sup>3</sup> Department of Bioengineering, Stanford University, Stanford, California, USA

10 <sup>4</sup> Department of Microbiology, University of Pennsylvania, Pennsylvania, Philadelphia, USA

11 <sup>5</sup> Department of Pathology, Stanford University, Stanford, California, USA

12 Contact: [smontgom@stanford.edu](mailto:smontgom@stanford.edu), [asbhatt@stanford.edu](mailto:asbhatt@stanford.edu)

## 13 Highlights

- 14 ● Chromatin accessibility changes longitudinally upon butyrate exposure in colon cancer  
15 cells.
- 16 ● Chromatin regions that close in response to butyrate are enriched among distal  
17 enhancers.
- 18 ● There is strong overlap between butyrate-induced peaks and peaks associated with  
19 SWI/SNF synthetic lethality.
- 20 ● Butyrate-induced peaks are enriched for colorectal cancer GWAS loci and somatic  
21 variation in colorectal cancer.
- 22

## 23 Summary

24 Butyrate is a four-carbon fatty acid produced in large quantities by bacteria found in the  
25 human gut. It is the major source of colonic epithelial cell energy, can bind to and agonize short-  
26 chain fatty acid G-protein coupled receptors and functions as a histone deacetylase (HDAC)  
27 inhibitor. Anti-cancer effects of butyrate are attributed to a global increase in histone acetylation  
28 in colon cancer cells; however, the role that corresponding chromatin remodeling plays in this  
29 effect is not fully understood. We used longitudinal paired ATAC-seq and RNA-seq on HCT-116

30 colon cancer cells to determine how butyrate-related chromatin changes functionally associate  
31 with cancer. We detected distinct temporal changes in chromatin accessibility in response to  
32 butyrate with less accessible regions enriched in transcription factor binding motifs and distal  
33 enhancers. These regions significantly overlapped with regions maintained by the SWI/SNF  
34 chromatin remodeler, and were further enriched amongst chromatin regions that are associated  
35 with ARID1A/B synthetic lethality. Finally, we found that butyrate-induced chromatin regions  
36 were enriched for both colorectal cancer GWAS loci and somatic mutations in cancer. These  
37 results demonstrate the convergence of both somatic mutations and GWAS risk variants for  
38 colon cancer within butyrate-responsive chromatin regions, providing a molecular map of the  
39 mechanisms by which this microbial metabolite might confer anti-cancer properties.

## 40 Introduction

41 Dietary components that reach the colon are used by the colonic microbial community  
42 and yield diverse metabolites. Among these are fermentation products known as short-chain  
43 fatty acids (SCFAs) (Wu et al., 2018). Butyrate is among the most well-studied SCFAs in the  
44 context of colorectal cancer (Donohoe et al., 2012). Butyrate has a variety of functions, including  
45 HDAC inhibition (Donohoe et al., 2012) and binding to GPCR receptors (Husted et al., 2017).  
46 Colonic epithelial cells metabolize butyrate as a primary source of energy, but due to the  
47 Warburg effect, glucose is utilized instead of butyrate as the primary energy source in colon  
48 cancer cells (Donohoe et al., 2012; Fleming et al., 1991; Roediger, 1982). It is hypothesized that  
49 this allows butyrate to accumulate intracellularly and act as a potent HDAC inhibitor in colon  
50 cancer cells. This accumulation of butyrate further manifests in global increases in histone  
51 acetylation and subsequent chromatin remodelling that are expected to underlie its anti-cancer  
52 effects on colon cancer cells, including diminished proliferation (Donohoe et al., 2012). Such  
53 chromatin accessibility changes in response to butyrate have been previously studied in rumen  
54 epithelial cells (Fang et al., 2019) and leukemia cells (Frank et al., 2016). However, the specific

55 changes in chromatin accessibility and associated gene expression changes induced by  
56 butyrate exposure in colon cancer cells have not been well characterized.

57 HDAC inhibition has been linked to a number of protein complexes involved in cancer,  
58 including the SWI/SNF (SWItch/Sucrose Non-Fermentable) complex (Fukumoto et al., 2018).  
59 SWI/SNF complex subunits are collectively mutated in approximately 20 percent of all cancers  
60 (Garraway and Lander, 2013; Kadoch et al., 2013; Mathur et al., 2017). ARID1A is the most  
61 frequently mutated subunit in this complex. ARID1A mutations sensitize cancer cells to HDAC  
62 inhibition (Fukumoto et al., 2018). ARID1A loss has also been shown to drive colon cancer in  
63 mice via impairment of enhancer-mediated gene regulation (Mathur et al., 2017). However,  
64 combinations of loss of function in SWI/SNF complex subunits can induce synthetic lethality in  
65 cancer cells. For example, a loss of function of both ARID1A and ARID1B induces synthetic  
66 lethality in HCT-116 colon cancer cells (Kelso et al., 2017). Though HDAC inhibition and  
67 SWI/SNF mutations and regulation are linked in the context of cancer, their mechanisms of  
68 interaction and the role of butyrate remain unclear.

69 The interactions between the human gut microbiome and common germline genetic  
70 variants and somatic mutations in the host is an area of active research providing the potential  
71 for discovery of new cancer risk factors and treatments. One recent study demonstrated that the  
72 gut microbe metabolite gallic acid may interact with somatic mutations in p53 to influence  
73 oncogenesis (Kadosh et al., 2020). Butyrate is considered to be an ideal candidate to discover  
74 such gene-environment interactions due to its diverse cellular functions and direct relationship  
75 to dietary fiber intake (Bultman, 2014). In this study, we aim to identify how butyrate modulates  
76 the effect of both common germline variants and somatic mutations that influence colorectal  
77 cancer through butyrate-stimulated chromatin accessibility changes in human host cells.

## 78 Results

### 79 *Butyrate decreases chromatin accessibility in distal enhancer regions*

80 The HDAC-inhibitory effect of butyrate is well-documented (Donohoe et al., 2012).  
81 HDAC inhibition suggests greater histone acetylation throughout the genome, which our own  
82 experiments confirmed (Fig. S1). To test the effect of butyrate on the chromatin conformation of  
83 colon cancer cells, we exposed HCT-116 cells to control conditions or butyrate. We generated  
84 longitudinal ATAC-Seq libraries for three time points at 9, 18, and 24 hours for the butyrate-  
85 exposed samples and the controls. We sequenced a total of 746,181,642 ATAC-Seq reads  
86 (range = 44,659,678-138,802,186 reads per replicate). For each time point, we observed strong  
87 nucleosome phasing and transcription start site enrichment (Fig. S2). Differential accessibility  
88 analysis indicated the number of peaks opening and closing in response to butyrate treatment  
89 was roughly equal over the time course (Fig. 1A & Table S1). In total, 6,128 peaks were found  
90 to be differentially accessible during at least one time point ( $FDR < 0.1$ ,  $|\log_2(\text{Fold Change})| > 1$ ;  
91 Fig. 1A), representing ~12% of the 52,530 peaks tested (Table S2). Principal components  
92 analysis demonstrated that butyrate treatment was the primary source of variation (Fig. S3A).  
93 Furthermore, we observed that the total number of differentially accessible peaks increased as  
94 time progressed and subsequently referred to chromatin regions that became less accessible in  
95 response to butyrate as “closed peaks” and regions that became more accessible as “open  
96 peaks.” While the opening of chromatin was expected given the function of butyrate as an  
97 HDAC inhibitor, the large number of closed peaks despite global increases in histone  
98 acetylation was surprising, albeit not unprecedented (Frank et al., 2016).

99 Longitudinal gene expression data was also generated using RNA-seq. We sequenced a  
100 total of 810,869,958 RNA-Seq reads (range = 65,806,356-107,642,896 reads per replicate).  
101 Differential expression analysis indicated that approximately 78.4% of genes were differentially

102 expressed in response to butyrate during at least one time point (FDR < 0.05), and 69.7% of  
103 those genes were differentially expressed above  $|\log_2(\text{Fold Change})| > 1$ . Principal components  
104 analysis of RNA-seq data suggested that butyrate treatment and time after exposure were the  
105 primary sources of variation in the data (Fig. S3B). Gene set enrichment analysis (GSEA)  
106 indicated several pathways that were differentially expressed; for example, we observed a  
107 significant down-regulation of E2F targets and G2M checkpoint genes, indicating that butyrate  
108 strongly impacted cell growth (Fig. S3C). By combining chromatin-accessibility and gene  
109 expression data, we also found evidence that differentially-accessible regions were associated  
110 with differentially-expressed genes (Fig. S3D).

111         Next, we inspected the distribution of differentially accessible peaks across the genome.  
112 We found that closed peaks were particularly enriched in intergenic regions that were distal to  
113 the nearest TSS (Fig. 1B). Peaks that were distantly upstream (<-500 kbp from TSS) or  
114 downstream (>500 kbp from TSS) were found to be the most strongly enriched in closed peaks  
115 across all time points, and especially at 9 hours following butyrate exposure. By contrast, the  
116 genomic pattern observed in the open peaks was much less conserved across all three time  
117 points, and the enrichment/depletion effect sizes were relatively modest. This suggests that the  
118 effect of butyrate on closing peaks was more targeted and consistent than the effect on the  
119 opening peaks.

120         To determine if butyrate-induced peaks were enriched/depleted in cis-regulatory  
121 elements (CREs), we used ENCODE data made available through the SCREEN web interface  
122 to identify candidate CREs (Fig. 1C). Both closed and open peaks were depleted of promoter-  
123 like, proximal enhancer-like, and CTCF-only CREs. Closed peaks were strongly enriched  
124 ( $\log_2(\text{FC}) > 1$ ) for distal enhancer-like elements. Taken together, these data indicate that  
125 butyrate induced both the closing and opening of peaks across the genome, but the closed  
126 peaks were particularly enriched for distal enhancer regions, especially at 9 hours after butyrate

127 exposure, while the genomic location of the open peaks appeared more sporadic across the  
 128 time points.

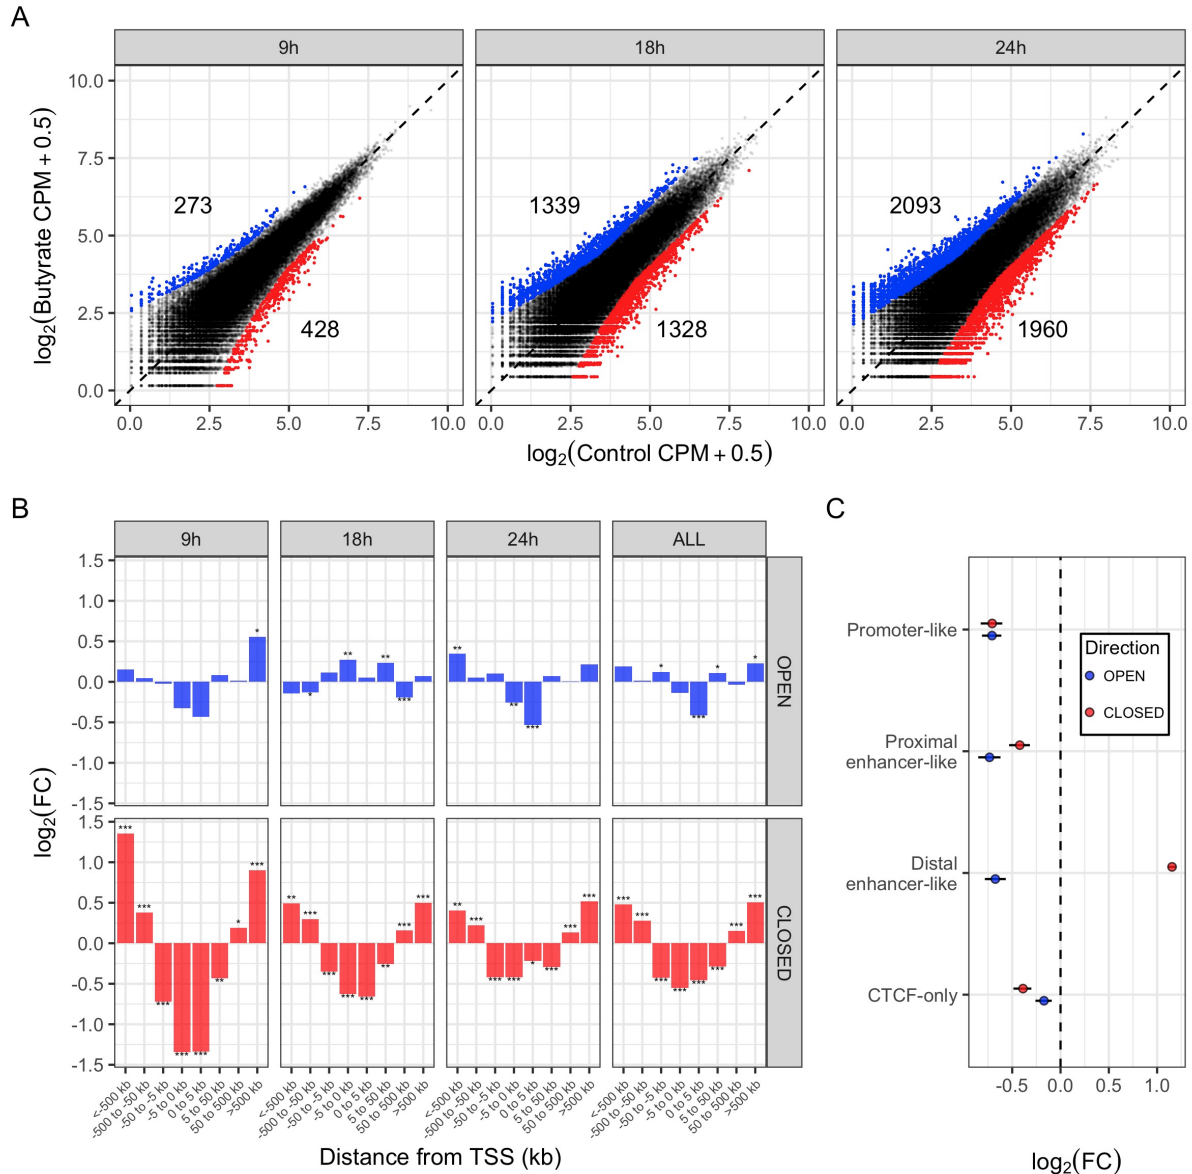

**Figure 1. Butyrate decreases chromatin accessibility in distal enhancer regions.**

(A) Differentially accessible genomic regions as measured by ATAC-seq. Showing three time points following butyrate treatment compared to untreated controls. The average  $\log_2(\text{CPM})$  is shown. Blue points are regions that become significantly more accessible in response to butyrate treatment (open peaks;  $\text{FDR} < 0.05$  and  $\log_2(\text{FC}) > 1$ ). Red points are regions that become significantly less accessible in response to butyrate treatment (closed peaks;  $\text{FDR} < 0.05$  and  $\log_2(\text{FC}) < -1$ ). Numbers above the blue points and below the red points indicate the total number of significantly more open and closed peaks at each time point, respectively.

(B) Enrichment of open and closed regions at different distances from the nearby transcription start sites (TSS). Enrichment was calculated using a hypergeometric test, with the  $\log_2(\text{Hypergeometric Fold Change})$  values shown on the y-axis. Positive values along the y-axis indicate that the regions in the given distance bin are enriched relative to the background of all tested regions, negative values indicate that they are depleted. The column labeled "ALL" indicates all open/closed peaks across all time points considered together. "\*" indicates FDR < 0.05, "\*\*\*" indicates FDR < 0.01, "\*\*\*\*" indicates FDR < 0.001. Negative numbers along the x-axis indicate regions that are upstream of a nearby TSS, and positive numbers are downstream of a nearby TSS. (C) Enrichment of open and closed peaks overlapping with different HCT116 candidate cis-regulatory elements (CREs) as determined from ENCODE data and made available through the SCREEN web interface. Only shown are enrichment/depletion of all significantly open and closed peaks aggregated across all three time points. Lines through each point indicate the 95% bootstrapped confidence interval of the  $\log_2(\text{Hypergeometric Fold Change})$ .

129

130 *Butyrate-induced closed peaks are enriched for transcription factor binding,*  
131 *including SWI/SNF complex, AP-1 complex, and TEAD binding sites.*

132 We next investigated whether differential peaks were significantly enriched for specific  
133 transcription factor binding targets. We compared our differentially accessible peaks to  
134 previously generated ChIP-seq peaks for the HCT-116 cell line (Fig. 2A). Open peaks were  
135 strongly depleted for most of the ChIP-seq signals, especially at 18 and 24 hours after butyrate  
136 exposure. Closed peaks, in contrast, showed significant enrichment in ChIP-seq signals across  
137 all three time points. In particular, SWI/SNF subunits SMARCA4 and SMARCC1 ChIP-seq  
138 peaks were the most strongly enriched among the butyrate-induced closed peaks at 9 hours,  
139 with a  $\log_2(\text{FC})$  of 2.46, suggesting that butyrate-induced closure of SWI/SNF binding sites is a  
140 particularly strong signal, especially early on following butyrate exposure. Binding sites for AP-1  
141 complex subunits FOSL1 and JUND were also strongly enriched in closed peaks, as well as  
142 TEAD, CEBP, CBX3, SP1, SRF, JAK2, and ATF3 binding sites.

143 We also used the HOMER motif finding software to identify enriched motifs *de novo* in  
144 both closed and open peaks (Fig. 2B) (Heinz et al., 2010). The most enriched motif in closed



145 peaks was similar to a Fos-associated binding motif, where 49.57% of all closed peaks  
 146 contained such a motif, compared to 30.73% of the background regions. Other enriched motifs  
 147 in closed peaks included those associated with the TEAD2, OTX1, and RUNX1 transcription  
 148 factors. The open peaks contained only one significant *de novo* motif (using the HOMER-  
 149 recommended significance cutoff) associated with transcription factor Zinc Finger Protein 692  
 150 (ZNF692). Taken together, these data suggest that butyrate exposure results in the selective  
 151 closure of multiple distal regulatory elements and chromatin loops that are being actively  
 152 maintained by the AP-1 complex and the SWI/SNF complex.

153  
 154

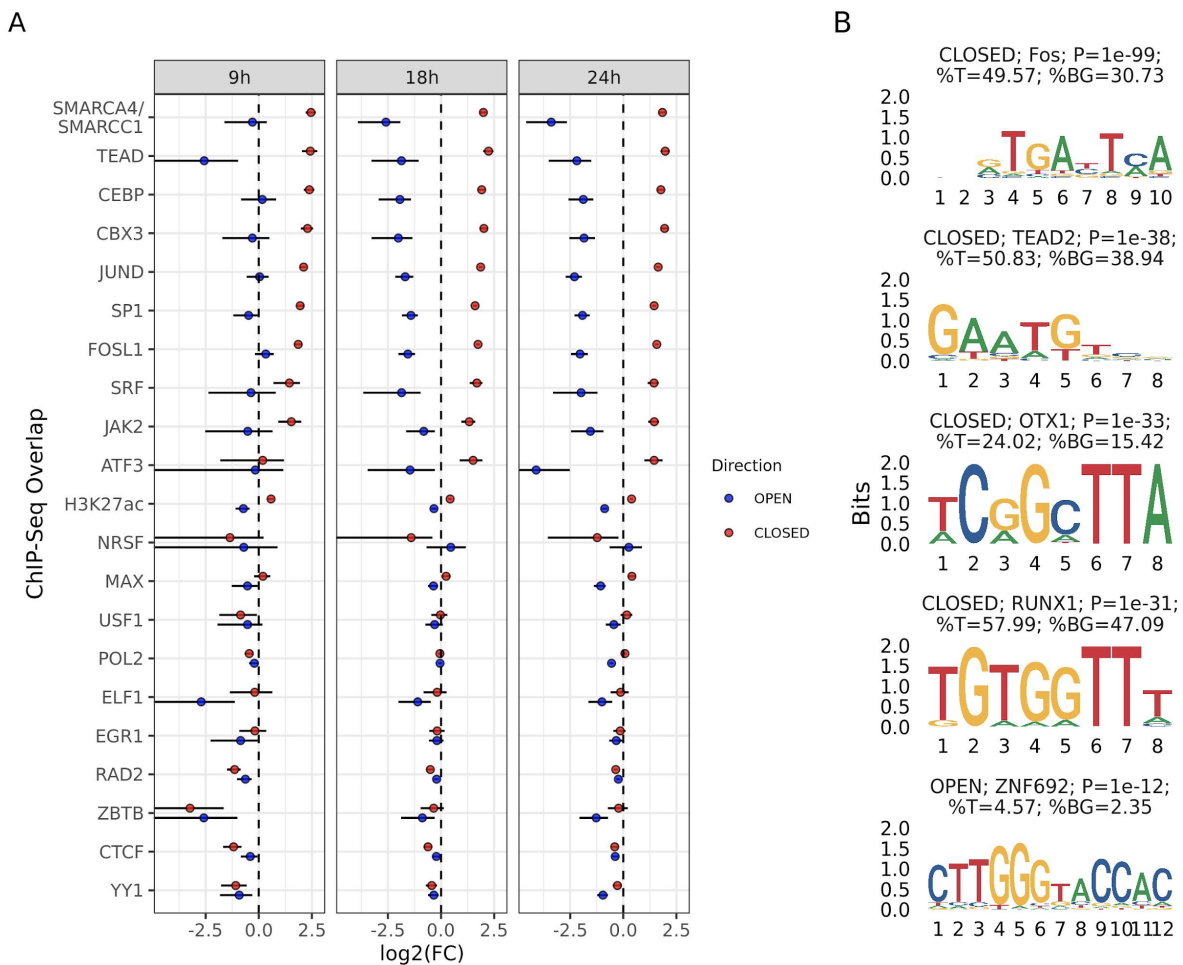



**Figure 2. Butyrate-induced closed peaks are enriched for transcription factor binding, including SWI/SNF complex, AP-1 complex, and TEAD binding sites.**

(A) Enrichment of Butyrate-induced peaks with ChIP-seq peaks. Each row corresponds to a different ChIP-Seq experiment performed on HCT-116 cells. Points indicate open (blue) and closed (red) peaks at 9, 18, and 24 hours after butyrate treatment. Lines through each point indicate the 95% bootstrapped confidence interval of the  $\log_2(\text{Hypergeometric Fold Change})$ .

(B) Top *de novo* motifs enriched in all significant butyrate-induced peaks as identified by the HOMER motif finding software. Showing the top 4 *de novo* motifs found across all closed peaks, and the only *de novo* motif in the open peaks that meets the HOMER-recommended significance threshold. Titles of each motif indicate if they were enriched in open/closed peaks, the protein with the best-matching known motif, the P-value of the enrichment statistic, the percentage of target (%T) sequences that contain the motif, and the percentage of background (%BG) sequences that contain the motif.

155

156 *Butyrate-induced peaks significantly overlap with regions associated with*  
157 *synthetic lethality of SWI/SNF complex subunits ARID1A/B*

158 We found that the chromatin accessibility changes that we observed due to butyrate  
159 exposure were similar to those reported in a study conducted by Kelso et al. (Kelso et al., 2017).  
160 In this study, Kelso et al. investigated the chromatin accessibility changes that occurred in the  
161 HCT-116 cell line in response to gene deletion and gene knockdown of two important SWI/SNF  
162 complex subunits, ARID1A and ARID1B. The SWI/SNF complex maintains chromatin  
163 architecture, and mutations in the ARID1A subunit are commonly found in cancer (Kadoch et  
164 al., 2013). Deficiency of the ARID1B subunit is synthetically lethal with ARID1A mutation, and it  
165 was this synthetic lethality that Kelso et al. further investigated in their study.

166 We analyzed the Kelso et al. (2017) publicly available ATAC-seq data using the same  
167 pipeline as we used for our own butyrate-treated ATAC-seq data (Fig. 3A, see Methods). Using  
168 the 52,530 peaks identified in our study, we identified differentially accessible peaks in the three  
169 treatments relative to our untreated control, as well as the ARID1A -/- & ARID1B KD treatment  
170 relative to the ARID1A -/- treatment as a control. The ARID1A -/- & ARID1B KD vs. ARID1A -/-  
171 comparison identified peaks that were specific to the synthetic lethality phenotype. We identified

172 12,324 total differentially accessible peaks, with 1,908, 5,080, and 141 peaks that opened in the  
173 ARID1A *-/-*, ARID1A *-/-* & ARID1B KD, and ARID1A *-/-* & ARID1B KD vs. ARID1A *-/-* treatments,  
174 respectively, and 3,748, 6,250, and 1,072 peaks that closed in the same three treatments,  
175 respectively.

176 We found that across the Kelso et al. (2017) differentially accessible peaks, there was  
177 significant overlap with butyrate-induced differentially accessible peaks (Fig. 3B). Butyrate-  
178 induced open peaks significantly overlapped with the Kelso et al. open peaks in all treatment  
179 conditions, and they were significantly depleted among the Kelso et al. closed peaks. Butyrate-  
180 induced closed peaks were significantly enriched among the Kelso et al. closed peaks in all  
181 treatment conditions, with the strongest effect among the peaks associated with synthetic  
182 lethality (ARID1A *-/-* & ARID1B KD vs. ARID1A *-/-* peaks;  $P < 0.001$ ;  $\log_2(\text{Hypergeometric Fold}$   
183  $\text{Change}) = 1.87$ ). Among the peaks associated with ARID1A/B synthetic lethality, 19.5% were  
184 also differentially accessible in the same direction in at least one of the butyrate-treated time  
185 points.

186 To test if the SWI/SNF subunit may be disrupted in response to butyrate treatment, we  
187 analyzed SWI/SNF subunit gene expression using RNA-seq (Fig. 3C). We found that all  
188 subunits of the SWI/SNF complex were significantly down-regulated during at least one time  
189 point ( $\text{FDR} < 0.1$ ), with the exception of SMARCA2 which was significantly upregulated at 9  
190 hours after butyrate exposure. The most significantly down-regulated gene belonging to the  
191 SWI/SNF complex across all three timepoints was ARID1B. Taken together, this indicates that  
192 the effect that butyrate has on these regions may be due in part to genetic down-regulation of a  
193 large number of the SWI/SNF complex subunits.

194

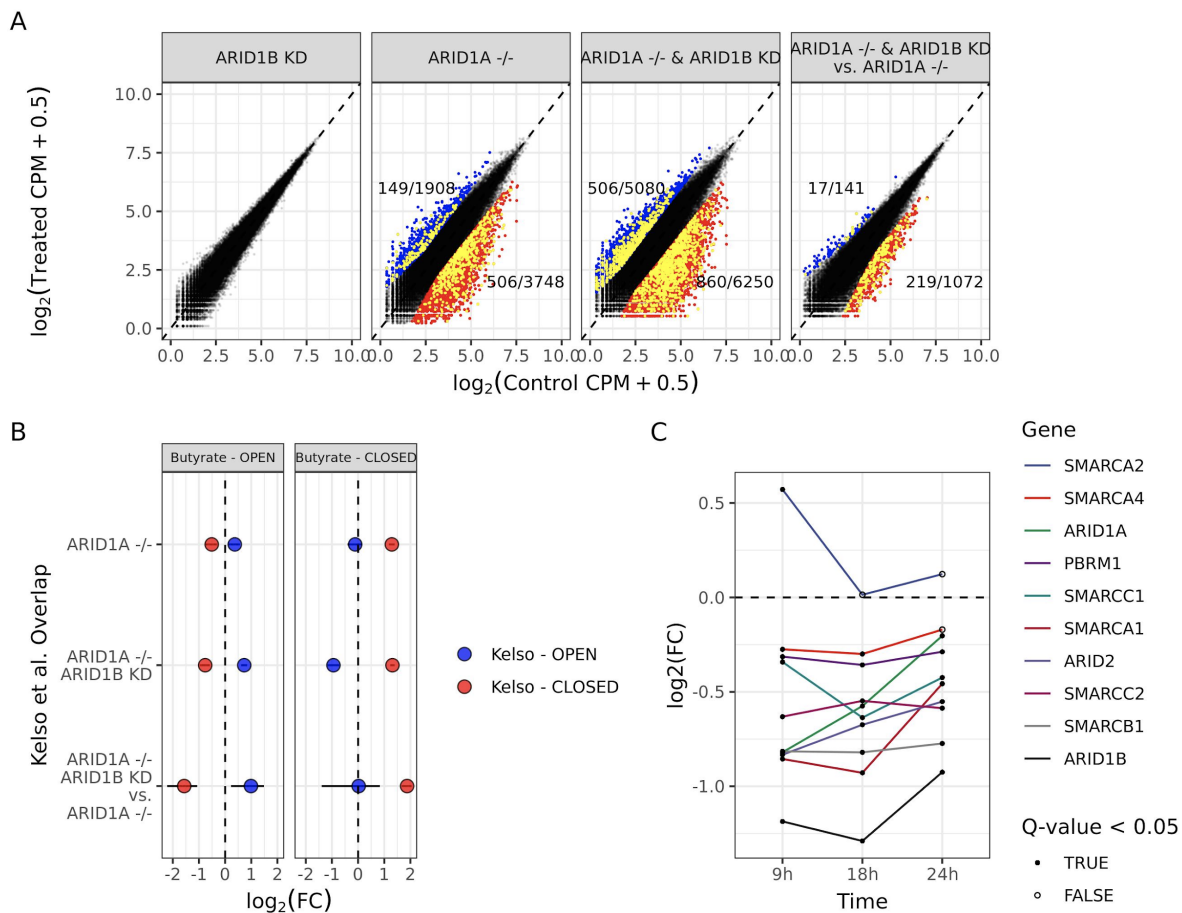

**Figure 3: Butyrate-induced peaks significantly overlap with regions associated with synthetic lethality of SWI/SNF complex subunits ARID1A/B.** (A) Differentially accessible genomic regions as measured by ATAC-seq of HCT-116 from data presented in the Kelso et al. (2017) study. Showing differential peaks under three conditions: shRNA knock down of ARID1B (ARID1B KD), homozygous loss of ARID1A (ARID1A -/-), and both conditions simultaneously (ARID1A -/- & ARID1B KD). Differential ATAC-seq peaks of these three conditions were determined relative to untreated controls, and were also determined in the ARID1A -/- & ARID1B KD treatment relative to the ARID1A -/- control (ARID1A -/- & ARID1B KD vs. ARID1A -/-). Blue points are regions that become significantly more accessible in response to each treatment (open peaks; FDR < 0.05 and  $\log_2(\text{FC}) > 1$ ). Red points are regions that become significantly less accessible in response to each treatment (closed peaks; FDR < 0.05 and  $\log_2(\text{FC}) < -1$ ). Yellow points are also differentially accessible in at least one of the butyrate-treated time points in this study. Fractions above the blue points and below the red points indicate the total number of significant open and closed peaks at each time point in the denominator, respectively, and the total number that overlap with butyrate-induced differentially accessible peaks in the numerator. (B) Enrichment of butyrate-induced open and closed peaks among the differentially accessible peaks in the Kelso et al. (2017) study. Blue and red points indicate the  $\log_2(\text{Hypergeometric Fold Change})$  of butyrate-induced open and closed peaks in the three treatment conditions. Lines through each point indicate

the 95% bootstrapped confidence interval of the  $\log_2$ (Hypergeometric Fold Change). (C) The  $\log_2$ (Fold Change) in gene expression of 10 subunits of the SWI/SNF complex as measured by RNA-seq relative to untreated controls. Showing time points 9 hours, 18 hours, and 24 hours after butyrate treatment. ARID1B is the only subunit that is significantly down-regulated in response to butyrate treatment, but the direction of the effect is consistent in the direction of down-regulation across all 3 time points for 9 of the 10 subunits.

195

196 *Differentially accessible chromatin regions are enriched for colorectal*

197 *cancer GWAS loci and cancer-associated somatic mutation*

198 To assess the role that butyrate-induced differential accessible regions may have to  
199 cancer, we first assessed if these regions were enriched for colorectal cancer heritability.  
200 Stratified LD-score regression has been used to determine if regions surrounding genes  
201 expressed in tissue-specific manner are enriched for disease heritability as measured by GWAS  
202 summary statistics (Finucane et al., 2018). Given the known association between butyrate and  
203 colorectal cancer, we used this same approach to determine if butyrate-responsive peaks are  
204 associated with colorectal cancer heritability.

205 The results of our heritability enrichment analysis indicated that open peaks were  
206 significantly enriched for colorectal cancer heritability ( $P = 0.019$ ), while closed peaks were not  
207 ( $P = 0.790$ ), where positive normalized effect sizes indicate heritability enrichment (Fig. 4A).  
208 When we restricted our analysis to only distal peaks where the nearest gene is greater than 50  
209 kilobases away, we observed that the enrichment for colorectal cancer heritability slightly  
210 increases in the open peaks ( $P = 0.004$ ), and the closed peaks remain non-significant.

211 While this analysis measures colorectal cancer heritability enrichment within butyrate-  
212 responsive peaks, we next wanted to investigate the relevance of these peaks to somatic  
213 mutation in cancer. We used somatic mutation data generated by the Pan-Cancer Analysis of  
214 Whole Genomes (PCAWG), which includes 828 samples from the same number of donors  
215 across 16 body sites. We tested sets of peaks to determine if they were enriched or depleted for

216 somatic mutations by comparing their somatic mutation rate to the somatic mutation rate in  
217 peaks that were non-responsive to butyrate.

218           Given that the colon is the site of highest butyrate concentration within the body, we first  
219 limited our analysis to the 60 colorectal cancers available (Fig. 4B). In this analysis, we found  
220 that closed peaks were enriched for high somatic mutation rates (One-sample t-test;  $P =$   
221  $0.0008$ , Average  $\log_2(\text{Diff. Peak Mutation Rate} / \text{Background Mutation Rate}) = 0.258$ ), while  
222 open peaks were not (One-sample t-test;  $P = 0.438$ ; Average  $\log_2(\text{Diff. Peak Mutation Rate} /$   
223  $\text{Background Mutation Rate}) = 0.0438$ ). When limiting to only distal peaks, this enrichment  
224 disappeared. As butyrate can translocate into the bloodstream and thus can reach distal body  
225 sites, we next repeated this analysis across several different cancer types (Fig. S4). Notably, it  
226 was only in colorectal cancer where we observed somatic mutation enrichment in closed peaks.  
227 In cancers at various body sites, closed peaks were often significantly depleted of somatic  
228 mutations (Bladder, Brain, Breast, Head and Neck, Kidney, Mesenchymal, Ovary, and Skin),  
229 and in several body sites open peaks were enriched (Head and neck, Kidney, Lung, Prostate,  
230 and Skin).

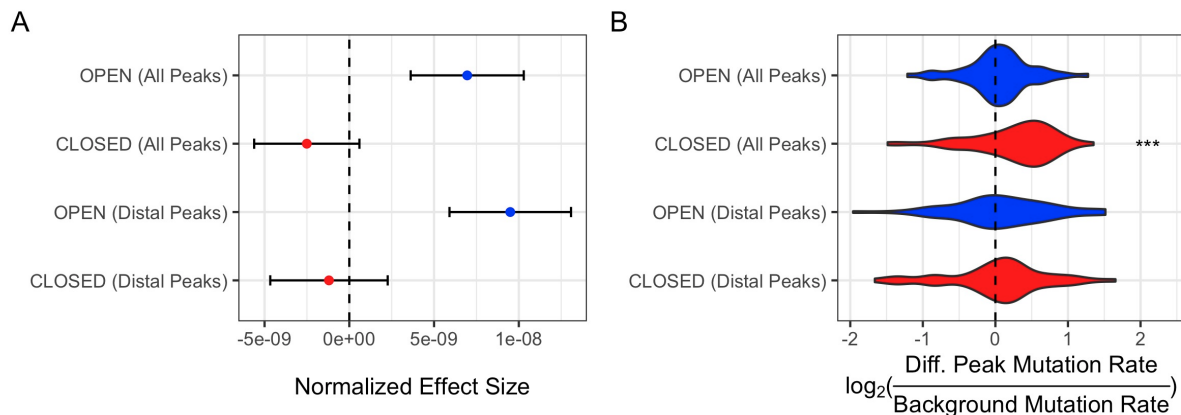

**Figure 4: Differentially accessible chromatin regions are enriched for colorectal cancer GWAS loci and cancer-associated somatic mutation.** (A) Heritability enrichment statistics for colorectal cancer as calculated using stratified LD-score regression and colorectal cancer GWAS summary statistics. Showing the normalized effect size of enrichment  $\pm$  standard error. Blue points refer to open peaks, red points refer to closed peaks. (B) Somatic mutation

enrichment in butyrate-responsive peaks in 60 colorectal cancer samples. Showing the distribution of  $\log_2(\text{Diff. Peak mutation Rate} / \text{Background Mutation Rate})$  values on each line.  $P < 0.001$  is represented as three asterisks. To test the “OPEN (Distal Peaks)” peak set, only 57 samples were used because in three samples the relative mutation rate could not be calculated due to low number of mutations.

## 231 Discussion

232 While many studies have demonstrated strong associations between the gut microbiome  
233 composition and various diseases, studying host-microbe interactions has been challenging  
234 from a mechanistic perspective (Bhutia et al., 2017). Certainly, alteration of the gut microbiome,  
235 in some cases with extreme therapies such as fecal microbiota transplantation, has produced  
236 therapeutic benefits in selected circumstances. However, choosing donors can be difficult, and  
237 the composition of bacteria is not guaranteed to remain entirely consistent or perform the same  
238 roles in the new context (Andremont, 2017; van Beurden et al., 2017; Olesen et al., 2016). A  
239 more conventional and controllable approach is to understand underlying mechanisms by  
240 identifying the effects that specific microbes and their metabolites elicit on host cells. Butyrate is  
241 among the most well studied microbial metabolites, and while its role in modifying the cellular  
242 composition of the intestinal lamina propria is known, the impact of butyrate on colonic epithelial  
243 cells at the genomic and gene-level is less well understood. In this work, we studied the effects  
244 of butyrate, a microbial metabolite, on HCT-116 colorectal cancer cells over time to reveal  
245 chromatin accessibility and gene expression changes and their relationship to cancer-related  
246 loci.

247 To characterize the mechanistic links between the microbial metabolite butyrate and  
248 specific chromatin accessibility and gene expression changes, we performed paired ATAC-seq  
249 and RNA-seq on HCT-116 cells to monitor the effects of butyrate on colon cancer cells over  
250 time. We hypothesized that butyrate would increase chromatin accessibility of regions across

251 the genome, driving gene expression changes. Despite global increases in histone acetylation  
252 via butyrate, widespread, targeted ‘closing’ of regions of chromatin was more strongly  
253 associated with significant effects on the cells. Interestingly, SWI/SNF subunits were collectively  
254 downregulated upon butyrate exposure, and the closed chromatin regions we identified were  
255 actively maintained by the SWI/SNF complex. This indicates that butyrate alters chromatin  
256 accessibility in multiple ways, both directly via HDAC inhibition, and indirectly via  
257 downregulation of the SWI/SNF complex, thus disrupting maintenance of chromatin structure.

258         Additionally, we find that butyrate may influence colorectal cancer susceptibility both in  
259 terms of germline variation and somatic mutation, our assumption being that through changing  
260 the accessibility of the relevant genomic variants butyrate modulates their downstream  
261 phenotypic effects. Interestingly, the open peaks were enriched for germline variation  
262 associated with colorectal cancer, while the closed peaks were enriched for somatic variants in  
263 colorectal cancer. The specificity of the somatic mutation enrichment to colorectal cancer was  
264 further notable, as it suggests that the tissue that is most directly exposed to butyrate is the  
265 most relevant in terms of potential gene-environment interactions.

266         We acknowledge that our conclusions are limited in their scope. Further experiments are  
267 necessary to determine the direct mechanism by which butyrate affects SWI/SNF-associated  
268 regions. The fact that the SWI/SNF effect is strongest at 9 hours after exposure indicates that  
269 this is the strongest initial effect of butyrate exposure, and other transcriptional and chromatin  
270 accessibility effects may be downstream consequences of early SWI/SNF inhibition. The  
271 associations with germline and somatic colorectal cancer risk also warrants further experimental  
272 investigation. The fact that peaks that open in response to butyrate are enriched for heritability  
273 as measured by a GWAS of common variants while closed peaks are enriched for somatic  
274 variation in cancer is an interesting finding that we were not able to address in the scope of this  
275 study. Additionally, it is not clear from this study to what extent these findings can be  
276 generalized to non-cancerous cells, where butyrate does not accumulate at high concentrations.



277 Finally, it is not clear to what extent cancerous cells may adapt to high levels of butyrate over  
278 time, potentially circumventing the anti-cancer effects of butyrate exposure.

279 In conclusion, we present evidence that highlights potential mechanisms by which  
280 butyrate, a prevalent microbial metabolite, influences colorectal cancer risk. The global effects  
281 of butyrate on chromatin accessibility have been observed in the past, and it is likely that other  
282 microbial metabolites have similarly dramatic effects on host gene expression and chromatin  
283 accessibility. Dietary composition is known to play a role in the production of butyrate, and  
284 increasing the production of butyrate in the gut has been proposed as a therapeutic strategy to  
285 treat a wide range of human diseases (Canani et al., 2011). We believe that this study can help  
286 direct further efforts to develop such therapies and to more thoroughly understand their  
287 mechanism of action.

## 288 Methods

### 289 *Cell Culture*

290 HCT-116 cells were purchased from Sigma (91091005). HCT-116 cells were grown in  
291 Dulbecco's Modified Eagle's Medium (DMEM, Sigma-Aldrich) supplemented with 10 percent  
292 Fetal Bovine Serum (FBS, Gibco) in T25 flasks. At 60 percent confluency, media was replaced  
293 with serum-free DMEM media containing differential quantities of butyrate (Alfa Aesar) for  
294 various times. Replicates were exposed to the same conditions in different flasks. At designated  
295 times, 50,000 cells from each replicate were frozen in 10 percent Dimethyl sulfoxide (DMSO)  
296 and 90 percent FBS to be used for ATAC-Sequencing. The remaining cells in the flask were  
297 snap frozen to be utilized for RNA-Sequencing.

## 298 *ATAC-Seq*

299           ATAC-seq was performed on 50,000 HCT-116 cells from each treatment. Each  
300 treatment was done in biological replicate. All conditions were performed in the same batch.  
301 50,000 cells were established as yielding the highest quality libraries for HCT-116 cells.  
302 Protocols for ATAC-Seq performed as described (Buenrostro et al., 2013, 2015). These libraries  
303 were pooled and sequenced on a Next-Seq 500 (Illumina), obtaining 101 base pair paired-end  
304 data.

## 305 *RNA-Sequencing*

306           RNA was extracted from HCT-116 cells using the RNA-Easy Mini Plus Kit (Qiagen).  
307 Likewise, each treatment was performed in biological duplicate consistent with the ATAC-seq  
308 duplicates. All conditions were performed in the same batch. 2 ug of total RNA, quantified using  
309 the Qubit RNA HS kit, was used as input for Tru-seq mRNA Stranded kit (Illumina). Standard  
310 Illumina protocols were performed. The libraries were pooled and sequenced on a Next-seq 500  
311 (Illumina), obtaining 101 base pair paired-end data.

## 312 *ATAC-seq Analysis*

313           Sequences were run through the Big Data Script ATAC-seq pipeline created by the  
314 Kundaje lab ([https://github.com/kundajelab/atac\\_dnase\\_pipelines](https://github.com/kundajelab/atac_dnase_pipelines)). Data was processed as  
315 previously described (Corces et al., 2016; Miyamoto et al., 2018). The Several dependencies  
316 were utilized (Daley and Smith, 2013; Langmead and Salzberg, 2012; Quinlan and Hall, 2010).  
317 This pipeline utilizes macs2 (Zhang et al., 2008) for peak calling. Peaks were called by merging  
318 all of the optimal IDR peak calls from each time point. Read counts per peak were calculated  
319 using the bedtools coverage command line utility (Quinlan and Hall, 2010). Prior to calling  
320 differential peaks, counts were quantile normalized using the preprocessCore package in R.

321 This was necessary to overcome a strong increase in noise observed in time points 18 and 24  
322 following butyrate treatment. Quantile-normalized counts were then used to identify differentially  
323 accessible ATAC-seq peaks using edgeR (Robinson et al., 2010). The two replicates at each  
324 time point were individually compared to three control samples taken at 9 hours, 18 hours, and  
325 24 hours. Peaks with a q-value less than 0.1 and a  $|\log_2(\text{Fold Change})| > 1$  were considered to  
326 be differentially accessible. The same workflow was used to analyze the ATAC-seq data  
327 produced by Kelso et al, with the exception of using the merged peaks from our study rather  
328 than re-calling peaks on their data.

### 329 *RNA-sequencing Analysis*

330 Reads were deduplicated using Super Deduper (Petersen et al., 2015) and adapters  
331 were trimmed using Trim Galore version 0.6.6 and Cutadapt version 1.18 (Martin, 2011).  
332 GRCh37 was used as the reference genome. Reads were aligned using STAR version 2.7.6a  
333 (Dobin et al., 2013). These files were sorted and used as input for HTSeq version 0.11.3  
334 (Anders et al., 2015). Raw counts were analyzed using DESeq2 (Love, Huber, and Anders  
335 2014). Genes were only considered if their counts per million (CPM) exceeded 1 in at least one  
336 of the replicates of each treatment, and then only if cutoff was met in all treatments, resulting in  
337 13,398 genes. Significance was assigned with a q-value  $< 0.05$  after Benjamini and Hochberg  
338 correction (Dabney et al., 2011). Gene set enrichment analysis of differentially expressed genes  
339 were performed using Enrichr (Kuleshov et al., 2016).

### 340 *Enrichment analysis - distance from transcription start site (TSS)*

341 The distance of each ATAC-seq peak to the nearest gene was calculated by using the  
342 GREAT web service version 3.0.0 (McLean et al., 2010). Peaks were associated with nearby  
343 genes using the “Basal+extension” approach, where the basal domain is defined as a minimal

344 regulatory domain surrounding and including each gene, which is defined as 5,000 base pairs  
345 upstream to 1,000 base pairs downstream. This basal region is extended by up to 1 megabase,  
346 or until it reaches the basal domain of another gene. This means that an ATAC-seq peak can be  
347 associated with multiple genes if it is found in the extended regulatory region of both of those  
348 genes. Enrichment of specific subsets of the peaks at different distances from nearby genes  
349 were calculated using a two-sided hypergeometric test. All tested peaks were used as a  
350 background population for each subset of peaks tested.

### 351 *Enrichment analysis - ENCODE cis-regulatory elements*

352 ENCODE cis-regulatory element regions were downloaded from  
353 <https://screen.encodeproject.org/>, and an enrichment analysis was carried out much in the same  
354 way as described in the previous section. BEDTools was used to identify ATAC-seq peaks that  
355 overlapped with ENCODE cis-regulatory elements. A two-sided hypergeometric test was used,  
356 with all tested peaks as a null background, to determine if specific differentially accessible  
357 ATAC-seq subsets were enriched for the four cis-regulatory element categories - promoter-like,  
358 proximal enhancer-like, distal enhancer-like, and ctf-only elements.

### 359 *Enrichment analysis - ChIP-seq datasets*

360 Peaks for 20 transcription factor ChIP-seq experiments in HCT-116 cell line were  
361 downloaded from ENCODE, with the exception of the ChIP-seq peaks for the SMARCA4 and  
362 SMARCC1 subunits of the SWI/SNF complex which were previously published and made  
363 available upon publication (Mathur et al., 2017). Two-sided hypergeometric tests were used as  
364 described in the previous methods sections to determine if the differentially accessible peaks  
365 were enriched for specific ChIP-Seq signals.

## 366 *Enrichment analysis - Kelso et al. Dataset*

367 Publicly available ATAC-seq data from the Kelso et al. study was analyzed using the  
368 same pipeline as we used for our own butyrate-treated ATAC-seq data (Fig. 3A). This produced  
369 sets of differentially accessible peaks that could then be directly compared to between the two  
370 studies. Two-sided hypergeometric tests were used as described in the previous methods  
371 sections to determine if there was significant overlap between differentially accessible peaks in  
372 the two datasets.

## 373 *HOMER motif analysis*

374 The HOMER motif analysis software was used to identify motifs that were enriched in  
375 differentially accessible peaks, with all tested peaks used as a background. All *de novo* motifs  
376 identified at  $P < 1e-12$  are shown in Fig. 2b. The HOMER findMotifsGenome.pl command was  
377 used with the default parameters.

## 378 *LD-score regression analysis of colorectal cancer GWAS*

379 Stratified LD score regression was used to test whether colorectal cancer heritability was  
380 enriched in peaks that open or close in response to butyrate treatment (Bulik-Sullivan et al.,  
381 2015; Finucane et al., 2015, 2018). Using colorectal cancer GWAS data from (Zhou et al.,  
382 2018), enrichment was tested in two sets of open (1330 and 3194 peaks respectively) and  
383 closed (1453 and 2935 peaks respectively) peaks evaluated against different backgrounds. The  
384 regression was adjusted for the set of all background peaks relevant to each enrichment test,  
385 and enrichment for open and closed peaks were tested separately. In all tests, we added a 10kb  
386 window on either side of each peak.

## 387 *Analysis of somatic variants associated with cancer*

388 A total of 828 whole-genome somatic variants VCF files were downloaded from data  
389 storage services provided by the Pan-Cancer Analysis of Whole Genomes (PCAWG) project  
390 (ICGC/TCGA Pan-Cancer Analysis of Whole Genomes Consortium, 2020). These samples all  
391 came from the TCGA wing of the study that was conducted in the USA. Both SNPs and indels  
392 were included in the analysis. The somatic mutation rate was calculated in the differentially  
393 accessible ATAC-seq peaks for each sample, and then compared to the mutation rate in the  
394 non-differentially accessible peaks. This same mutation rate ratio was also calculated for the  
395 just the distal peaks. Samples were then grouped by body site of origin, and the log-transformed  
396 ratios were tested using a two-sided, one-sample t-test to determine if the regions were  
397 enriched or depleted of somatic variations relative to the background mutation rate.

## 398 *Cell Counting Assays*

399 Cells were grown in T25 flasks in triplicate - three flasks per condition per treatment. At  
400 designated times, cells were trypsinized, resuspended, and counted using a hemocytometer.  
401 This was independently repeated three times. Results were visualized using ggplot2 (Wickham,  
402 2016).

## 403 *Extracting Nuclear Protein*

404 HCT-116 cells were lysed in 10 mM Tris·Cl, pH 7.4, 10 mM NaCl, 3 mM MgCl<sub>2</sub>, 0.1%  
405 (v/v) Igepal CA-630. The supernatant was removed (cytoplasmic protein). The nuclear pellet  
406 was lysed with Radioimmunoprecipitation assay (RIPA) buffer. Protein quantification of nuclear  
407 extract was performed using Bicinchoninic acid assay (BCA, Pierce). For total protein extraction  
408 to be used for Western blots, however, RIPA buffer (Pierce) was the only lysis buffer utilized.

## 409 *HDAC Activity in Nuclear Extracts*

410 HCT-116 nuclear extracts were treated with 1.5 mM butyrate in triplicate. We performed  
411 Fluor De Lys HDAC fluorometric activity assay (Enzo Life Sciences) with manufacturer's  
412 protocols, using 6 µg of nuclear extract and 200 µM substrate in a 50 µL total reaction each  
413 Fluor De Lys HDAC fluorometric activity assay (Enzo Life Sciences). This was incubated for 2  
414 hours at 37 °C. 50 µL of developer was added. Fluorescence was measured at 350 excitation  
415 450 emission 15 minutes later. This was performed on a Tecan Infinite M1000 Pro. Costar 3628  
416 flat bottom 96 well plates were used for HDAC assays.

417

## 418 *Statistical Analysis of HDAC activity and Cell Number*

419 Overall significance was assessed by One-way ANOVA (ANalysis Of VAriance).  
420 Differences between groups were revealed via post-hoc Tukey HSD (Honestly Significant  
421 Difference) test. All measurements were visualized as standard error of the mean (SEM).

## 422 *Western Blots*

423 25 µg of protein, quantified with BCA, was loaded onto Bolt 10 percent Bis-Tris gels  
424 (Invitrogen) and transferred via iBlot 2 technology (Invitrogen). Standard Licor protocol was  
425 performed. LI-COR Odyssey Infrared Imaging System was used to visualize results. Western  
426 blots were independently validated three times. Anti-Histone H3 (acetyl K9 + K14 + K18 + K23 +  
427 K27) antibody (ab47915) was used to measure acetylation of histones. Monoclonal Anti-B-Actin  
428 (A5316, Sigma) was used as a control.



## 429 Data and Software Availability

430 The accession number for the ATAC-Seq and RNA-Seq data generated in this study and  
431 reported in this paper can be found in SRA under Bioproject PRJNA715317.

## 432 Supplementary Information

433 Supplemental Information includes Supplemental Experimental Procedures, six figures,  
434 and two tables.

## 435 Acknowledgements

436 The authors would like to thank Anshul Kundaje and Peyton Greenside for their advice  
437 and guidance in running the Big Data Script ATAC-seq pipeline and performing differential  
438 analysis. Sequencing costs were supported via NIH S10 Shared Instrumentation Grant  
439 (1S10OD02014101), Damon Runyon Clinical Investigator Award to A.S.B., and the Stanford  
440 ADRC grant # P50AG047366. A.S.B. was supported by a V Foundation grant, McCormick  
441 award, and NIH grants AI148623 and AI143757. B.J.F was supported by the National Science  
442 Foundation Graduate Research Fellowship DGE-114747 and by a grant from the Stanford  
443 Center for Computational, Evolutionary and Human Genomics. M.D was supported by the  
444 National Science Foundation Graduate Research Fellowship. S.B.M. was supported by NIH  
445 grants R01AG066490, U01HG009431, R01HL142015 and R01HG008150

## 446 Author Contributions

447 B.J.F., M.D, S.B.M. and A.S.B conceived of the study. A.S.B and S.B.M supervised the

448 research. B.J.F. generated experimental data. M.D performed bioinformatic analyses. A.R.  
449 performed statistical analyses. E.C. initially troubleshot culturing and performing ATAC-Seq on  
450 HCT-116 cells. B.J.F and M.D. wrote the manuscript. A.S.B, S.B.M, and E.C. edited the  
451 manuscript.

## 452 Declaration of Interests

453 S.B.M is on the Scientific Advisory Board of Myome Inc. A.S.B. is on the Scientific  
454 Advisory Board of Caribou Biosciences and ArcBio.

## 455 References

- 456 Anders, S., Pyl, P.T., and Huber, W. (2015). HTSeq--a Python framework to work with high-  
457 throughput sequencing data. *Bioinformatics* *31*, 166–169.
- 458 Andreumont, A. (2017). Too Early to Recommend Early Fecal Microbiota Transplantation in  
459 Patients With Severe *Clostridium difficile* Infection, or Not Too Early? *Clin. Infect. Dis.* *66*, 651–  
460 652.
- 461 van Beurden, Y.H., Nieuwdorp, M., van de Berg, P.J.E.J., Mulder, C.J.J., and Goorhuis, A.  
462 (2017). Current challenges in the treatment of severe infection: early treatment potential of fecal  
463 microbiota transplantation. *Therap. Adv. Gastroenterol.* *10*, 373–381.
- 464 Bhutia, Y.D., Ogura, J., Sivaprakasam, S., and Ganapathy, V. (2017). Gut Microbiome and  
465 Colon Cancer: Role of Bacterial Metabolites and Their Molecular Targets in the Host. *Curr.*  
466 *Colorectal Cancer Rep.* *13*, 111–118.
- 467 Buenrostro, J.D., Giresi, P.G., Zaba, L.C., Chang, H.Y., and Greenleaf, W.J. (2013).  
468 Transposition of native chromatin for fast and sensitive epigenomic profiling of open chromatin,  
469 DNA-binding proteins and nucleosome position. *Nat. Methods* *10*, 1213–1218.
- 470 Buenrostro, J.D., Wu, B., Chang, H.Y., and Greenleaf, W.J. (2015). ATAC-seq: A Method for  
471 Assaying Chromatin Accessibility Genome-Wide. *Curr. Protoc. Mol. Biol.* *109*, 21.29.1–9.
- 472 Bulik-Sullivan, B.K., Loh, P.-R., Finucane, H.K., Ripke, S., Yang, J., Schizophrenia Working  
473 Group of the Psychiatric Genomics Consortium, Patterson, N., Daly, M.J., Price, A.L., and  
474 Neale, B.M. (2015). LD Score regression distinguishes confounding from polygenicity in  
475 genome-wide association studies. *Nat. Genet.* *47*, 291–295.
- 476 Bultman, S.J. (2014). Molecular pathways: gene–environment interactions regulating dietary  
477 fiber induction of proliferation and apoptosis via butyrate for cancer prevention. *Clin. Cancer*  
478 *Res.*

- 479 Canani, R.B., Costanzo, M.D., Leone, L., Pedata, M., Meli, R., and Calignano, A. (2011).  
480 Potential beneficial effects of butyrate in intestinal and extraintestinal diseases. *World J.*  
481 *Gastroenterol.* *17*, 1519–1528.
- 482 Corces, M.R., Buenrostro, J.D., Wu, B., Greenside, P.G., Chan, S.M., Koenig, J.L., Snyder,  
483 M.P., Pritchard, J.K., Kundaje, A., Greenleaf, W.J., et al. (2016). Lineage-specific and single-cell  
484 chromatin accessibility charts human hematopoiesis and leukemia evolution. *Nat. Genet.* *48*,  
485 1193–1203.
- 486 Dabney, A., Storey, J.D., and Warnes, G.R. (2011). qvalue: Q-value estimation for false  
487 discovery rate control. R package version 1.26. 0.
- 488 Daley, T., and Smith, A.D. (2013). Predicting the molecular complexity of sequencing libraries.  
489 *Nat. Methods* *10*, 325–327.
- 490 Dobin, A., Davis, C.A., Schlesinger, F., Drenkow, J., Zaleski, C., Jha, S., Batut, P., Chaisson,  
491 M., and Gingeras, T.R. (2013). STAR: ultrafast universal RNA-seq aligner. *Bioinformatics* *29*,  
492 15–21.
- 493 Donohoe, D.R., Collins, L.B., Wali, A., Bigler, R., Sun, W., and Bultman, S.J. (2012). The  
494 Warburg effect dictates the mechanism of butyrate-mediated histone acetylation and cell  
495 proliferation. *Mol. Cell* *48*, 612–626.
- 496 Fang, L., Liu, S., Liu, M., Kang, X., Lin, S., Li, B., Connor, E.E., Baldwin, R.L., 6th, Tenesa, A.,  
497 Ma, L., et al. (2019). Functional annotation of the cattle genome through systematic discovery  
498 and characterization of chromatin states and butyrate-induced variations. *BMC Biol.* *17*, 68.
- 499 Finucane, H.K., Bulik-Sullivan, B., Gusev, A., Trynka, G., Reshef, Y., Loh, P.-R., Anttila, V., Xu,  
500 H., Zang, C., Farh, K., et al. (2015). Partitioning heritability by functional annotation using  
501 genome-wide association summary statistics. *Nat. Genet.* *47*, 1228–1235.
- 502 Finucane, H.K., Reshef, Y.A., Anttila, V., Slowikowski, K., Gusev, A., Byrnes, A., Gazal, S., Loh,  
503 P.-R., Lareau, C., Shoshitaishvili, N., et al. (2018). Heritability enrichment of specifically expressed  
504 genes identifies disease-relevant tissues and cell types. *Nat. Genet.* *50*, 621–629.
- 505 Fleming, S.E., Fitch, M.D., DeVries, S., Liu, M.L., and Kight, C. (1991). Nutrient utilization by  
506 cells isolated from rat jejunum, cecum and colon. *J. Nutr.* *121*, 869–878.
- 507 Frank, C.L., Manandhar, D., Gordân, R., and Crawford, G.E. (2016). HDAC inhibitors cause  
508 site-specific chromatin remodeling at PU.1-bound enhancers in K562 cells. *Epigenetics*  
509 *Chromatin* *9*, 15.
- 510 Fukumoto, T., Park, P.H., Wu, S., Fatkhutdinov, N., Karakashev, S., Nacarelli, T., Kossenkov,  
511 A.V., Speicher, D.W., Jean, S., Zhang, L., et al. (2018). Repurposing Pan-HDAC Inhibitors for  
512 ARID1A-Mutated Ovarian Cancer. *Cell Rep.* *22*, 3393–3400.
- 513 Garraway, L.A., and Lander, E.S. (2013). Lessons from the Cancer Genome. *Cell* *153*, 17–37.
- 514 Heinz, S., Benner, C., Spann, N., Bertolino, E., Lin, Y.C., Laslo, P., Cheng, J.X., Murre, C.,  
515 Singh, H., and Glass, C.K. (2010). Simple Combinations of Lineage-Determining Transcription  
516 Factors Prime cis-Regulatory Elements Required for Macrophage and B Cell Identities. *Mol.*  
517 *Cell* *38*, 576–589.

- 518 Husted, A.S., Trauelsen, M., Rudenko, O., Hjorth, S.A., and Schwartz, T.W. (2017). GPCR-  
519 Mediated Signaling of Metabolites. *Cell Metab.* 25, 777–796.
- 520 ICGC/TCGA Pan-Cancer Analysis of Whole Genomes Consortium (2020). Pan-cancer analysis  
521 of whole genomes. *Nature* 578, 82–93.
- 522 Kadoch, C., Hargreaves, D.C., Hodges, C., Elias, L., Ho, L., Ranish, J., and Crabtree, G.R.  
523 (2013). Proteomic and bioinformatic analysis of mammalian SWI/SNF complexes identifies  
524 extensive roles in human malignancy. *Nat. Genet.* 45, 592–601.
- 525 Kadosh, E., Snir-Alkalay, I., Venkatachalam, A., May, S., Lasry, A., Elyada, E., Zinger, A.,  
526 Shaham, M., Vaalani, G., Mernberger, M., et al. (2020). The gut microbiome switches mutant  
527 p53 from tumour-suppressive to oncogenic. *Nature* 586, 133–138.
- 528 Kelso, T.W.R., Porter, D.K., Amaral, M.L., Shokhirev, M.N., Benner, C., and Hargreaves, D.C.  
529 (2017). Chromatin accessibility underlies synthetic lethality of SWI/SNF subunits in ARID1A-  
530 mutant cancers. *Elife* 6.
- 531 Kuleshov, M.V., Jones, M.R., Rouillard, A.D., Fernandez, N.F., Duan, Q., Wang, Z., Koplev, S.,  
532 Jenkins, S.L., Jagodnik, K.M., Lachmann, A., et al. (2016). Enrichr: a comprehensive gene set  
533 enrichment analysis web server 2016 update. *Nucleic Acids Res.* 44, W90–W97.
- 534 Langmead, B., and Salzberg, S.L. (2012). Fast gapped-read alignment with Bowtie 2. *Nat.*  
535 *Methods* 9, 357–359.
- 536 Martin, M. (2011). Cutadapt removes adapter sequences from high-throughput sequencing  
537 reads. *EMBnet.journal* 17, 10.
- 538 Mathur, R., Alver, B.H., San Roman, A.K., Wilson, B.G., Wang, X., Agoston, A.T., Park, P.J.,  
539 Shivdasani, R.A., and Roberts, C.W.M. (2017). ARID1A loss impairs enhancer-mediated gene  
540 regulation and drives colon cancer in mice. *Nat. Genet.* 49, 296–302.
- 541 McLean, C.Y., Bristor, D., Hiller, M., Clarke, S.L., Schaar, B.T., Lowe, C.B., Wenger, A.M., and  
542 Bejerano, G. (2010). GREAT improves functional interpretation of cis-regulatory regions. *Nat.*  
543 *Biotechnol.* 28, 495–501.
- 544 Miyamoto, K., Nguyen, K.T., Allen, G.E., Jullien, J., Kumar, D., Otani, T., Bradshaw, C.R.,  
545 Livesey, F.J., Kellis, M., and Gurdon, J.B. (2018). Chromatin Accessibility Impacts  
546 Transcriptional Reprogramming in Oocytes. *Cell Rep.* 24, 304–311.
- 547 Olesen, S.W., Gurry, T., and Alm, E.J. (2016). Designing fecal microbiota transplant trials that  
548 account for differences in donor stool efficacy.
- 549 Petersen, K.R., Streett, D.A., Gerritsen, A.T., Hunter, S.S., and Settles, M.L. (2015). Super  
550 deduper, fast PCR duplicate detection in fastq files. In *Proceedings of the 6th ACM Conference*  
551 *on Bioinformatics, Computational Biology and Health Informatics*, (New York, NY, USA:  
552 Association for Computing Machinery), pp. 491–492.
- 553 Quinlan, A.R., and Hall, I.M. (2010). BEDTools: a flexible suite of utilities for comparing genomic  
554 features. *Bioinformatics* 26, 841–842.
- 555 Robinson, M.D., McCarthy, D.J., and Smyth, G.K. (2010). edgeR: a Bioconductor package for  
556 differential expression analysis of digital gene expression data. *Bioinformatics* 26, 139–140.

- 557 Roediger, W.E. (1982). Utilization of nutrients by isolated epithelial cells of the rat colon.  
558 *Gastroenterology* 83, 424–429.
- 559 Wickham, H. (2016). *ggplot2: Elegant Graphics for Data Analysis* (Springer).
- 560 Wu, X., Wu, Y., He, L., Wu, L., Wang, X., and Liu, Z. (2018). Effects of the intestinal microbial  
561 metabolite butyrate on the development of colorectal cancer. *J. Cancer* 9, 2510–2517.
- 562 Zhang, Y., Liu, T., Meyer, C.A., Eeckhoute, J., Johnson, D.S., Bernstein, B.E., Nusbaum, C.,  
563 Myers, R.M., Brown, M., Li, W., et al. (2008). Model-based analysis of ChIP-Seq (MACS).  
564 *Genome Biol.* 9, R137.
- 565 Zhou, W., Nielsen, J.B., Fritsche, L.G., Dey, R., Gabrielsen, M.E., Wolford, B.N., LeFaive, J.,  
566 VandeHaar, P., Gagliano, S.A., Gifford, A., et al. (2018). Efficiently controlling for case-control  
567 imbalance and sample relatedness in large-scale genetic association studies. *Nat. Genet.* 50,  
568 1335–1341.
- 569
